# Supplementary material for: Predicting Postoperative Anterior Chamber Angle for Phakic Intraocular Lens Implantation Using Preoperative Anterior Segment Metrics
Source: PubMed Central journal article supplement — Transl Vis Sci Technol. 2023 Jan 6;12(1):10. doi: 10.1167/tvst.12.1.10 (PMC9836008; doi:10.1167/tvst.12.1.10), 2023-01-06
Supplement: tvst-12-1-10_s001.pdf [file tvst-12-1-10_s001.pdf]

## Predicting Postoperative Anterior Chamber Angle for Phakic Intraocular Lens Implantation Using Preoperative Anterior Segment Metrics

### Supplementary Materials

Supplementary Table 1. Definitions of AOD500, AOD750, ARA500, ARA750, TISA500, TISA750, TIA500, TIA750, SSA500, and SSA750.

| Variables | Definition                                                                                                                                                                                                                                                                                                                                    |
|-----------|-----------------------------------------------------------------------------------------------------------------------------------------------------------------------------------------------------------------------------------------------------------------------------------------------------------------------------------------------|
| AOD500    | AOD500 was measured as the perpendicular distance from the trabecular meshwork 500 $\mu\text{m}$ anteriorly from the scleral spur to the anterior iris surface.                                                                                                                                                                               |
| AOD750    | AOD750 was measured as the perpendicular distance from the trabecular meshwork 750 $\mu\text{m}$ anteriorly from the scleral spur to the anterior iris surface                                                                                                                                                                                |
| ARA500    | ARA500 is the trabecular-iris space area 500 $\mu\text{m}$ from the angle recess bounded anteriorly by the AOD500, posteriorly by a line drawn from the angle recess perpendicular to the plane of the inner scleral wall to the opposing iris, superiorly by the inner corneoscleral wall, and inferiorly by the iris surface.               |
| ARA750    | ARA750 is the trabecular-iris space area 750 $\mu\text{m}$ from the angle recess bounded anteriorly by the AOD750, posteriorly by a line drawn from the angle recess perpendicular to the plane of the inner scleral wall to the opposing iris, superiorly by the inner corneoscleral wall, and inferiorly by the iris surface.               |
| TISA500   | TISA500 was defined as the trabecular-iris space area 500 $\mu\text{m}$ from the scleral spur, bounded anteriorly by the AOD500, posteriorly by a line drawn from the scleral spur perpendicular to the plane of the inner scleral wall to the opposing iris, superiorly by the inner corneoscleral wall, and inferiorly by the iris surface. |
| TISA750   | TISA750 was defined as the trabecular-iris space area 750 $\mu\text{m}$ from the scleral spur, bounded anteriorly by the AOD750, posteriorly by a line drawn from the scleral spur perpendicular to the plane of the inner scleral wall to the opposing iris, superiorly by the inner corneoscleral wall, and inferiorly by the iris surface. |
| TIA500    | TIA was measured by tracing a line of 500 $\mu\text{m}$ from the angle recess toward the Schwalbe line and another line on the surface of the iris to the point perpendicular to the first line.                                                                                                                                              |
| TIA750    | TIA was measured by tracing a line of 750 $\mu\text{m}$ from the angle recess toward the Schwalbe line and another line on the surface of the iris to the point perpendicular to the first line.                                                                                                                                              |
| SSA500    | SSA500 was measured by tracing a line of 500 $\mu\text{m}$ from the scleral spur toward the Schwalbe line and another line on the surface of the iris to the point perpendicular to the first line.                                                                                                                                           |
| SSA750    | SSA750 was measured by tracing a line of 750 $\mu\text{m}$ from the scleral spur toward the Schwalbe line and another line on the surface of the iris to the point perpendicular to the first line.                                                                                                                                           |

Supplementary Table 2. Equations for predicting postoperative anterior chamber angles, including TIA500, TIA750, SSA500, and SSA750.

| Target variables     | Regression models using preoperative factors                                                                                                                                                                                                   |
|----------------------|------------------------------------------------------------------------------------------------------------------------------------------------------------------------------------------------------------------------------------------------|
| Postoperative TIA500 | $23.624 - 4.487 \times ICL \text{ size (mm)} - 2.308 \times \text{pupil size (dark, mm)}$ $+ 15.818 \times ACD \text{ (mm)} + 1.221 \times ACW \text{ (mm)}$ $+ 0.009 \times CLR \text{ (}\mu\text{m)} + 0.132 \times TIA750 \text{ (degree)}$ |
| Postoperative TIA750 | $34.011 - 5.000 \times ICL \text{ size (mm)} - 1.927 \times \text{pupil size (dark, mm)}$ $+ 12.517 \times ACD \text{ (mm)} + 1.651 \times ACW \text{ (mm)}$ $+ 0.007 \times CLR \text{ (}\mu\text{m)} + 0.065 \times TIA750 \text{ (degree)}$ |
| Postoperative SSA500 | $25.924 - 6.303 \times ICL \text{ size (mm)} - 3.007 \times \text{pupil size (dark, mm)}$ $+ 17.286 \times ACD \text{ (mm)} + 3.348 \times ACW \text{ (mm)}$ $+ 0.011 \times CLR \text{ (}\mu\text{m)} + 0.161 \times TIA750 \text{ (degree)}$ |
| Postoperative SSA750 | $32.378 - 5.973 \times ICL \text{ size (mm)} - 2.349 \times \text{pupil size (dark, mm)}$ $+ 15.959 \times ACD \text{ (mm)} + 2.466 \times ACW \text{ (mm)}$ $+ 0.008 \times CLR \text{ (}\mu\text{m)} + 0.112 \times TIA750 \text{ (degree)}$ |

AOD500, angle open distance at 500  $\mu\text{m}$ ; AOD750, angle open distance at 750  $\mu\text{m}$ ; ARA500, angle recess area at 500  $\mu\text{m}$ ; ARA750, angle recess area at 750  $\mu\text{m}$ ; ICL, implantable collamer lens; SSA500, scleral spur angle at 500  $\mu\text{m}$ ; SSA750, scleral spur angle at 750  $\mu\text{m}$ ; TISA500, trabecular iris space area at 500  $\mu\text{m}$ ; TISA750, trabecular iris space area at 750  $\mu\text{m}$ ; TIA500, trabecular iris angle at 500  $\mu\text{m}$ ; TIA750, trabecular iris angle at 750  $\mu\text{m}$

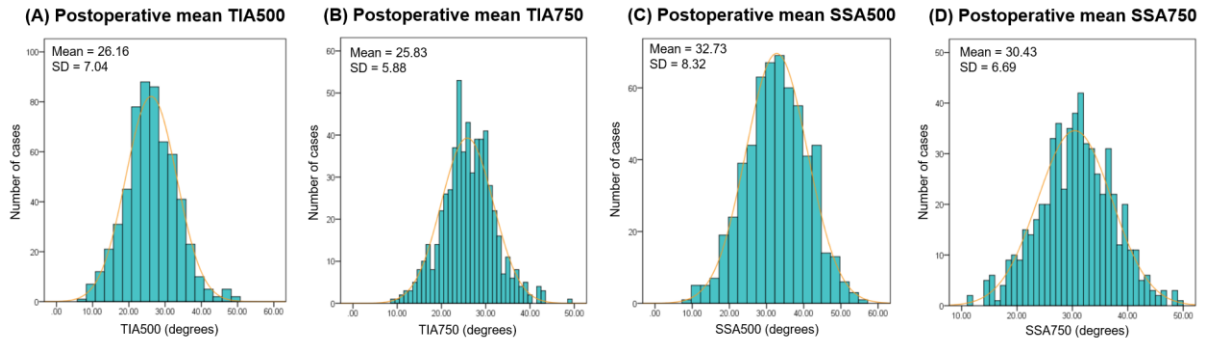

Supplementary Figure 1. Distribution of postoperative TIA500, TIA750, SSA500, and SSA750.

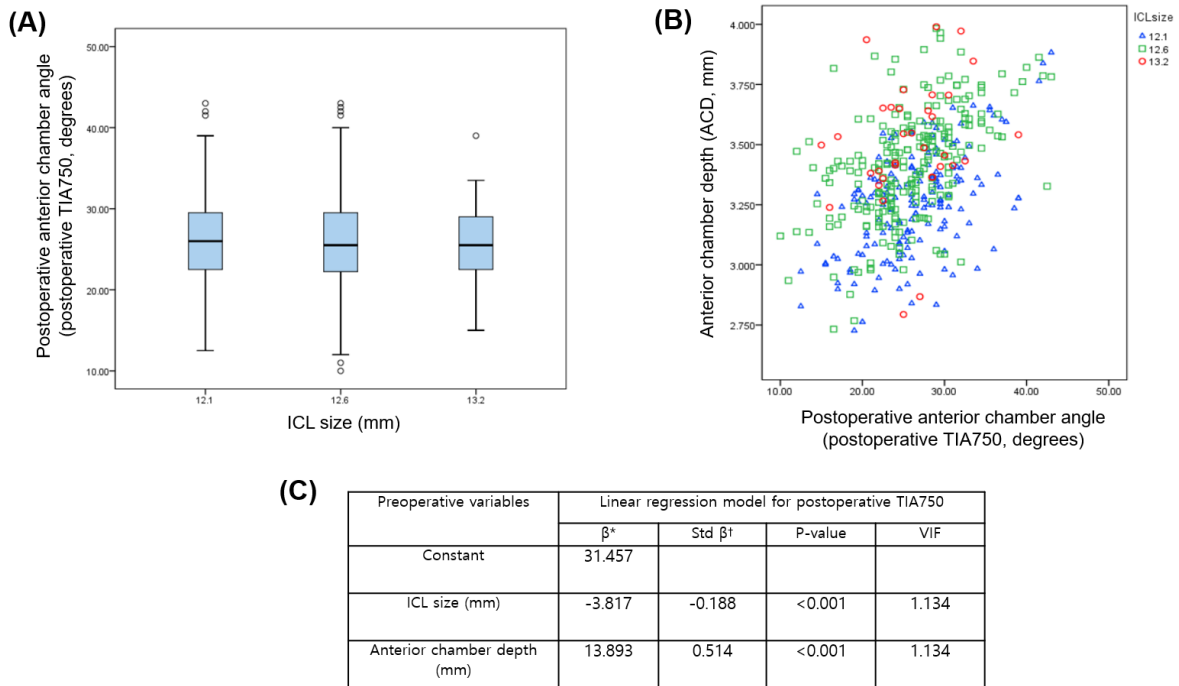

Supplementary Figure 2. Exploratory analyses related to the ICL size. (A) The box plots reveal no postoperative anterior chamber angle (TIA750) differences between different ICL sizes. (B) The distribution plot and (C) regression analysis reveal the interaction between anterior chamber depth and ICL size to predict postoperative anterior chamber angle (TIA750).

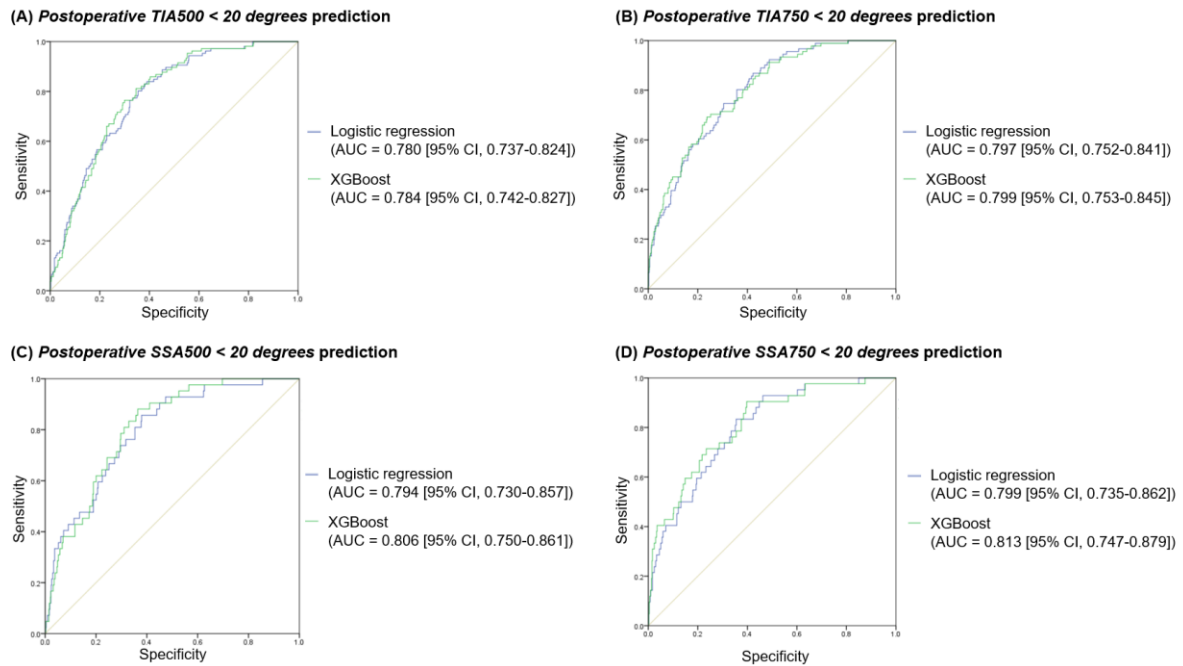

Supplementary Figure 3. Narrow ACAs (< 20°) prediction results using a five-fold cross-validation based on the whole dataset.

## Postoperative anterior chamber angle calculator for ICL surgery

The page for "Prediction of Postoperative Anterior Chamber Angle for Phakic Intraocular Lens Implantation Using Preoperative Anterior Segment Metrics"

ICL size (12.1/12.6/13.2/13.7):  mm  
 Pupil size (dark condition):  mm (average: 6.62 mm)  
 ACD (CASIA2):  mm (average: 3.36 mm)  
 ACW (CASIA2):  mm (average: 11.84 mm)  
 CLR (CASIA2):  μm (average: -77.0 μm)  
 TIA750 (CASIA2):  degrees (average: 53.3 degrees)

Postoperative anterior chamber angle prediction:  
 Postop TIA500:  (degrees)  
 Postop TIA750:  (degrees)  
 Postop SSA500:  (degrees)  
 Postop SSA750:  (degrees)

powered by VISUWORKS Inc.

Supplementary Figure 4. Calculator webpage established for postoperative ACA prediction based on preoperative measurements. The application is publicly accessible via a web browser (<https://taekeuntoo.github.io/>) for a prompt hands-on experience with postoperative ACA prediction.
